# Supplementary material for: Fluorescence ‘turn-on’ probe for nanomolar Zn(ii) detection in living cells and environmental samples
Source: Royal Society of Chemistry journal article supplement (doi:10.1039/d2nj02012b), 2022-01-01
Supplement: d2nj02012b1.pdf [file d2nj02012b1.pdf]

## Supporting information

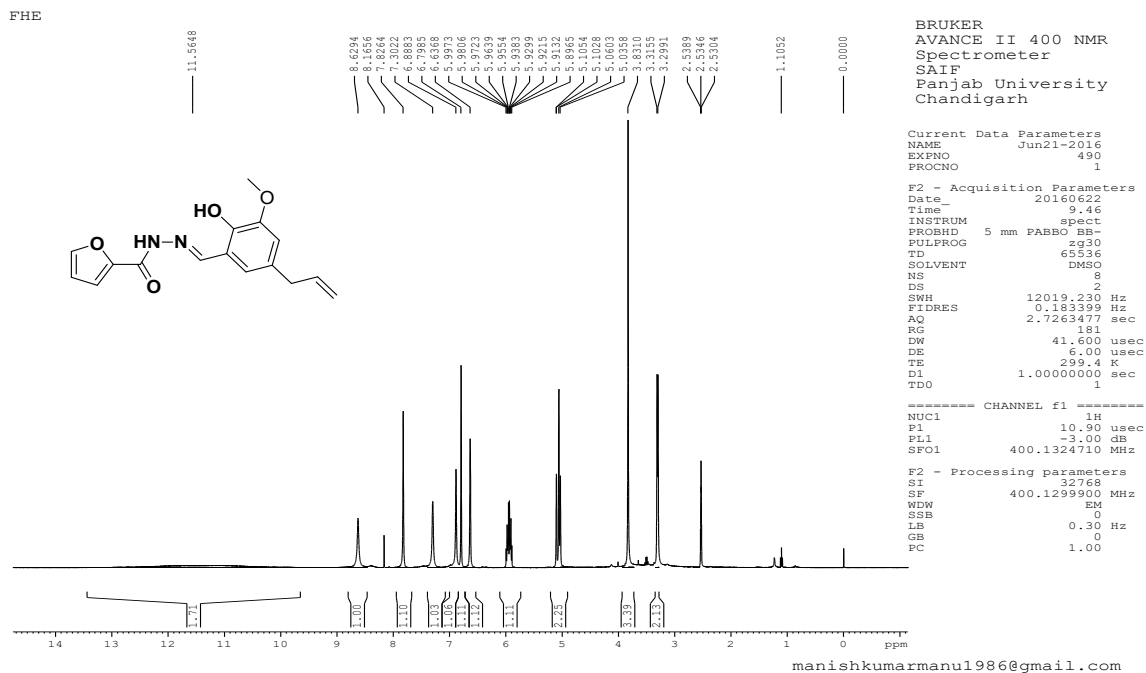

Figure S1. <sup>1</sup>H-NMR spectrum of FHE

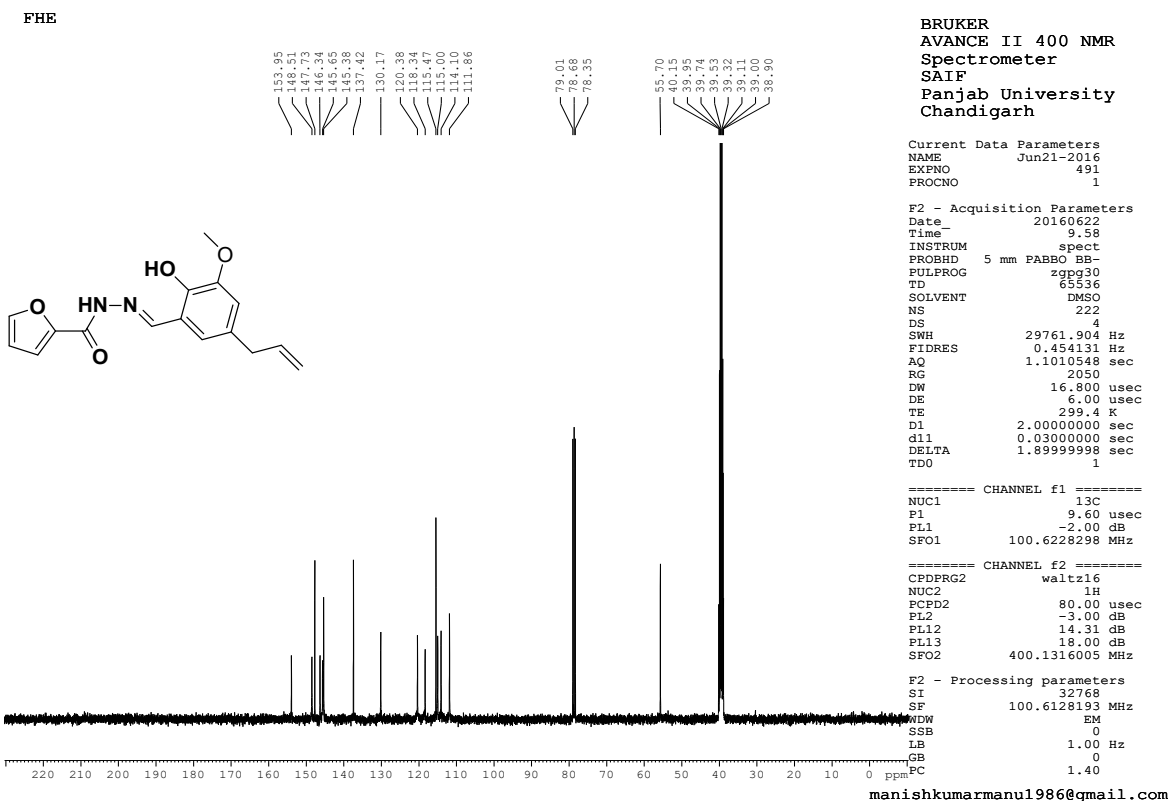

Figure S2. <sup>13</sup>C-NMR spectrum of FHE

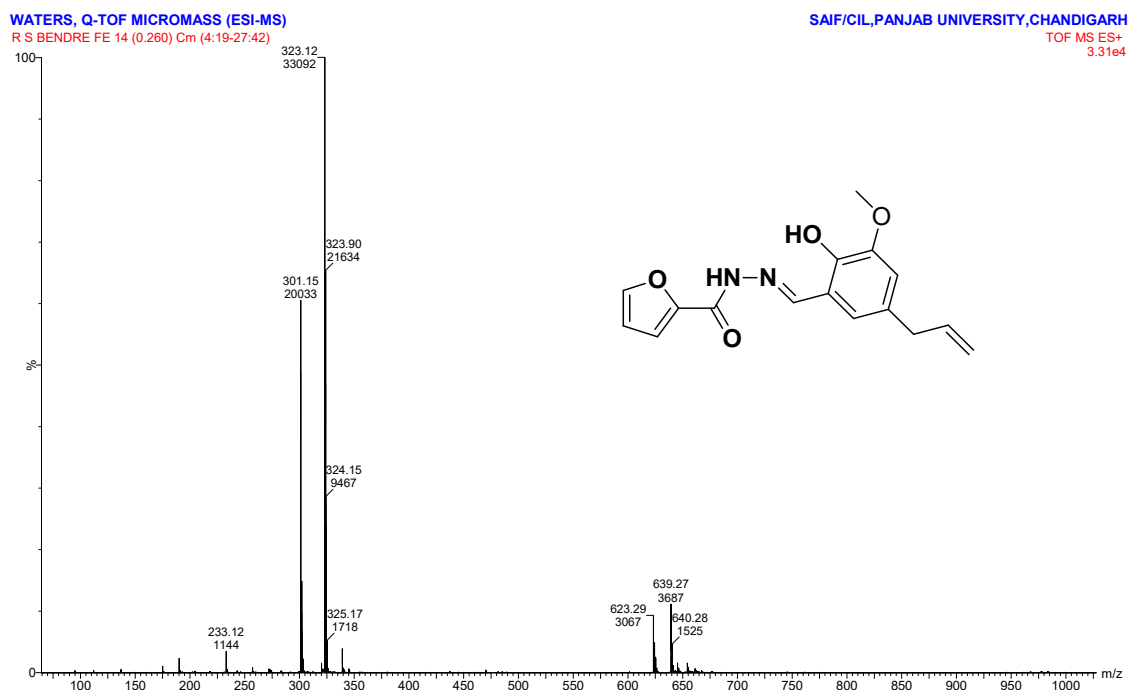

**Figure S3.** An HR-Mass spectrum of FHE

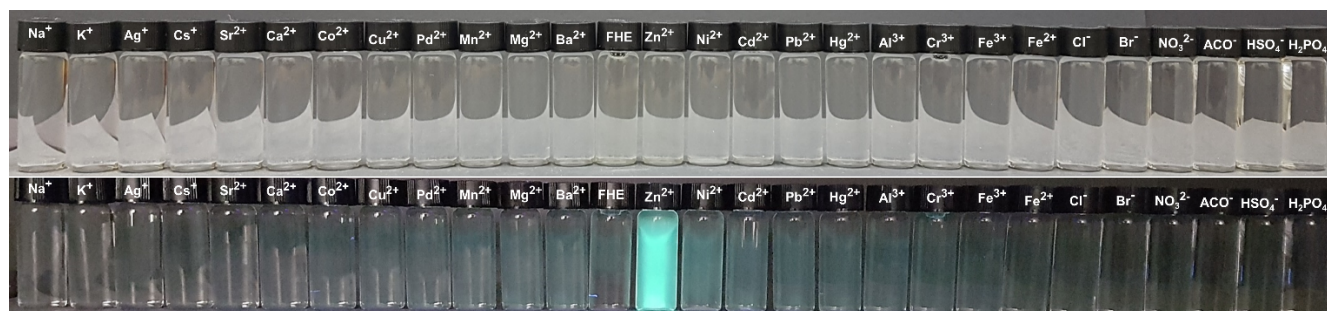

**Figure S4.** Changes in photophysical properties of FHE upon interaction with various cations and anions observed under visible light (top) and UV lamp with the wavelength 315 nm (bottom).

### Benesi-Hildebrand equation

$$\frac{1}{(F - F_0)} = \frac{1}{K_a(F_{max} - F_0)} \frac{1}{[Zn^{2+}]} + \frac{1}{(F_{max} - F_0)} \quad (Eq. S1)$$

Where,

$F_0$  is the fluorescence of FHE ( $\lambda_{ex} = 305$  nm,  $\lambda_{em} = 503$  nm)

$F$  is the fluorescence intensity in the presence of the varying  $[Zn^{2+}]$

$F_{max}$  is the maximum fluorescence intensity ( $\lambda_{ex} = 305$  nm,  $\lambda_{em} = 503$  nm) up on titration with  $[Zn^{2+}]$

$K_a$  is the association constant ( $M^{-1}$ )

$[Zn^{2+}]$  is the concentration of the  $Zn^{2+}$  ion added during titration study

**Table S1.** Comparison of **FHE** and reported probes used for the  $Zn^{2+}$  detection

| Probe Structure                                                                                   | Stokes shift (nm) | LOD (nM)    | Detection mechanism | Solvent                                         | Application           |              | Ref.             |
|---------------------------------------------------------------------------------------------------|-------------------|-------------|---------------------|-------------------------------------------------|-----------------------|--------------|------------------|
|                                                                                                   |                   |             |                     |                                                 | Water sample analysis | Cell imaging |                  |
| 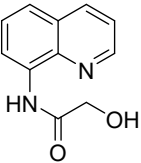                 | 140               | 650         | CHEF                | H <sub>2</sub> O/ethanol (8:2, v/v)             | ×                     | ✓            | 1                |
|                  | 135               | 98          | PET                 | ACN                                             | ×                     | ×            | 2                |
|                  | 135               | 95          | CHEF                | Ethanol                                         | ×                     | ×            | 3                |
|                 | 129               | 5070        | CHEF                | THF/H <sub>2</sub> O (8:2, v/v)                 | ×                     | ✓            | 4                |
|                | 88                | 284         | PET                 | CH <sub>3</sub> OH/H <sub>2</sub> O, (9:1, v/v) | ×                     | ×            | 5                |
|                | 114               | 77.4        | PET                 | CH <sub>3</sub> OH                              | ×                     | ×            | 6                |
| <br><b>FHE</b> | <b>198</b>        | <b>12.7</b> | <b>CHEF</b>         | <b>HEPES Buffer (pH = 7.4, ACN 50%, v/v)</b>    | ✓                     | ✓            | <b>This work</b> |

LOD, limit of detection; CHEF, complexation induced fluorescence enhancement; ACN, acetonitrile; PET, photoinduced electron transfer;

## References

- Shen, R., Liu, D., Hou, C., Cheng, J., Bai, D. New fluorescent probe for  $Zn^{2+}$  imaging in living cells and plants. *Anal. Methods*, 2016, 8, 83–88. <https://doi.org/10.1039/C5AY02380G>.

2. Ashokkumar, P., Ramakrishnan, V. T., Ramamurthy, P. Photoinduced Electron Transfer (PET) Based Zn<sup>2+</sup> Fluorescent Probe: Transformation of Turn-On Sensors into Ratiometric Ones with Dual Emission in Acetonitrile. *J. Phys. Chem. A.*, 2011, 115 (50), 14292–14299. DOI: 10.1021/jp209061f.
3. Shen, L.-Y., Chen, X.-L., Yang, X.-J., Xu, H., Huang, Y.-L., Zhang, X., Redshaw, C., Zhang, Q.-L. A Highly Selective Turn-On Fluorescent Probe for the Detection of Zinc. *Molecules* 2021, 26, 3825. <https://doi.org/10.3390/molecules26133825>.
4. Mariyappan, M., Malini, N., Sivamani, J. et al. Turn-on Fluorescence Chemosensor for Zn<sup>2+</sup> Ion Using Salicylate Based Azo Derivatives and their Application in Cell-Bioimaging. *J Fluoresc.* 2019, 29, 737–749. <https://doi.org/10.1007/s10895-019-02382-4>.
5. Guo, W.T., Peng, Y.D., Zhang, Y. et al. Novel Tridentate Bisoxime Chemosensor for Selective Recognition of Cu<sup>2+</sup> and Zn<sup>2+</sup> with Different Mechanisms. *J Appl Spectrosc.* 2021, 88, 452–460. <https://doi.org/10.1007/s10812-021-01193-5>.
6. Karmakar, M.; Chattopadhyay, S. Synthesis, structure and nitroaromatic sensing ability of a trinuclear zinc complex with a reduced Schiff base ligand: Assessment of the ability of the ligand to sense zinc ion. *Polyhedron* 2020, 187, 114639.
